# Supplementary material
Source: PubMed Central journal article supplement (PMC2689100)
Supplement: JCI38019sd.pdf [file JCI38019sd.pdf]

| GENE                                        | DISEASE OR MUTATION                                                                                                      | CHARACTERISTICS OF DISEASE OR MUTANT                                                                                                                                                                                                                                                                                                                                          | REFS.    |
|---------------------------------------------|--------------------------------------------------------------------------------------------------------------------------|-------------------------------------------------------------------------------------------------------------------------------------------------------------------------------------------------------------------------------------------------------------------------------------------------------------------------------------------------------------------------------|----------|
| <i>AP2 (TFAP2A)</i> (human)                 | Branchiooculofacial syndrome (BOFS)                                                                                      | Low birth weight, retarded postnatal growth, bilateral branchial cleft sinuses, congenital strabismus, obstructed nasolacrimal ducts, broad nasal bridge, protruding upper lip, and carp mouth. Occasionally seen are coloboma, microphthalmia, auricular pits, lip pits, highly arched palate, dental anomalies, and subcutaneous cysts of the scalp                         | (1–4)    |
| <i>Ap2</i> (mouse)                          | <i>Ap2</i> <sup>-/-</sup>                                                                                                | Die perinatally with craniobdominoschisis and severe dysmorphogenesis of the face, skull, sensory organs and cranial ganglia                                                                                                                                                                                                                                                  | (5)      |
|                                             | <i>Ap2</i> alpha -/-                                                                                                     | Neural tube defects followed by craniofacial and body wall abnormalities                                                                                                                                                                                                                                                                                                      | (6)      |
| <i>FLI1</i> (human)                         | Paris-Trousseau type Thrombocytopenia (TCPT): Homozygous deletion of <i>FLI1</i>                                         | Mental retardation, facial dysmorphism, clinodactyly, pyloric stenosis and thrombocytopenia                                                                                                                                                                                                                                                                                   | (7)      |
| <i>FOXD3</i> (human)                        |                                                                                                                          | Autosomal dominant vitiligo regulator of melanoblast differentiation                                                                                                                                                                                                                                                                                                          | (8)      |
| <i>FoxD3</i> (mouse)                        |                                                                                                                          | Embryonic lethality at E6.5, required for maintenance of epiblast cells and expansion of extraembryonic ectoderm and endoderm.                                                                                                                                                                                                                                                | (9)      |
| <i>FoxD3</i> (zebrafish)                    | <i>mother superior</i> mutation                                                                                          | Depletion of crest derivatives, leading to a protruding lower jaw, loss of cartilage in hyoid and posterior branchial arches, pigmentation defects particularly in the trunk iridophores and reduced number of neural precursors resulting in defective peripheral nervous system.                                                                                            | (10)     |
| <i>PAX3</i> (human)                         | Waardenburg Syndrome type I and III                                                                                      | Hearing loss and changes in skin and hair pigmentation                                                                                                                                                                                                                                                                                                                        | (11)     |
|                                             | Tumours                                                                                                                  | Rhabdomyosarcoma and tumours of neural crest origin, including melanoma and neuroblastoma                                                                                                                                                                                                                                                                                     |          |
| <i>Pax3</i> (mouse)                         | Spotch mutant                                                                                                            | Defects in neural crest derivatives such as, pigment cells, sympathetic ganglia and cardiac neural crest-derived structures.                                                                                                                                                                                                                                                  | (11)     |
| <i>ZEB2 (SIP1, ZFHX1B, SMADIP1)</i> (human) | Mowat-Wilson syndrome                                                                                                    | Hirschprung associated with microcephaly, mental retardation, hypertelorism, submucous cleft palate, short stature                                                                                                                                                                                                                                                            | (12–15)  |
| <i>Zeb2 (Sip1, ZFHX1B, SMADIP1)</i> (mouse) |                                                                                                                          | Early arrest in cranial neural crest migration                                                                                                                                                                                                                                                                                                                                | (16)     |
| <i>Snail1/Snail2</i> (mouse)                | Double knockout resembles Pierre Robin Sequence                                                                          | Micrognathia, fused mandible, enlarged parietal foramen in skull vault                                                                                                                                                                                                                                                                                                        | (17)     |
| <i>Snail2</i> (human)                       | Waardenburg-Shah syndrome 2                                                                                              | Defects in melanocytes, also seen with <i>Mitf</i> mutation                                                                                                                                                                                                                                                                                                                   | (18–20)  |
|                                             | Piebaldism (non-Kit related)                                                                                             | Heterozygous deletion of <i>SNAI2</i> gene                                                                                                                                                                                                                                                                                                                                    | (21)     |
| <i>Snail2</i> (chicken and frog)            | Inhibition of function                                                                                                   | Defective EMT and migration of neural crest and mesoderm                                                                                                                                                                                                                                                                                                                      | (22–24)  |
| <i>Sox8</i> (mouse)                         |                                                                                                                          | No effect as a single mutation but increases the severity of <i>Sox10</i> heterozygote; may be jointly required with <i>Sox10</i> for maintenance of vagal neural crest cells                                                                                                                                                                                                 | (25)     |
| <i>SOX9</i> (human)                         | Campomelic dysplasia                                                                                                     | Congenital skeletal malformation syndrome, includes cleft palate, low set ears, loss of the 12 <sup>th</sup> pair of ribs, abnormal pelvic bones, small chest and hip dislocations. May include absence of olfactory bulbs, renal and/or cardiac defects and XY sex reversal with genital malformations. Frequently associated with conductive and sensorineural hearing loss | (26, 27) |
| <i>Sox9</i> conditional (mouse)             | <i>Sox9</i> <sup>fllox/fllox</sup> , <i>Foxg1</i> <sup>Cre</sup><br>Cre activity driven in the prospective otic ectoderm | <i>Sox9</i> controls adhesive properties of placode cells; otic placodes are normally specified but invagination is impaired.                                                                                                                                                                                                                                                 | (28)     |
| <i>Sox9a</i> (zebrafish)                    | <i>Jellyfish</i> mutation                                                                                                | Lack cartilage elements of the neocranium, branchial arches and pectoral girdle; cartilage morphogenesis also disrupted                                                                                                                                                                                                                                                       | (29)     |

|                                                          |                                                            |                                                                                                                                                                                                                                                                                                                                                        |          |
|----------------------------------------------------------|------------------------------------------------------------|--------------------------------------------------------------------------------------------------------------------------------------------------------------------------------------------------------------------------------------------------------------------------------------------------------------------------------------------------------|----------|
| SOX10 haploinsufficiency (human)                         | Hirschsprungs disease (HSCR)                               | Failure of enteric ganglia to populate the distal colon                                                                                                                                                                                                                                                                                                | (30–32)  |
|                                                          | Waardenburg-Shah syndrome type 4                           | Deafness/pigmentation defect in addition to HSCR; also seen in EDN3 and EDNRB mutants                                                                                                                                                                                                                                                                  | (31)     |
| Sox10 <sup>-/-</sup> (mouse, <i>Xenopus</i> , zebrafish) | Colorless ( <i>D. rerio</i> )                              | Loss of melanocytes, autonomic and enteric neurons and peripheral glia. Crest cells fail to differentiate and die, can result in embryonic lethality                                                                                                                                                                                                   | (33–37)  |
| TBX1 (human)                                             | Di George syndrome                                         | Cardiac outflow tract anomalies, absence or hypoplasia of thymus and parathyroid glands, nasal voice (often associated with cleft palate or submucosal cleft palate) and facial dysmorphism. Known as conotruncal anomaly face                                                                                                                         | (38)     |
| TGFB1 (human)                                            | Loeys-Dietz syndrome (LDS1A and 2A)                        | LDS1 and 2 are clinically indistinguishable. Autosomal dominant aortic aneurysm syndromes characterized by the triad of arterial tortuosity and aneurysms, hypertelorism, and bifid uvula or cleft palate; Type 1 category presents cleft palate, craniosynostosis, or hypertelorism. Some patients assigned to the type 2 category had a bifid uvula. | (39, 40) |
|                                                          | Non-FBN1 related Marfan syndrome                           |                                                                                                                                                                                                                                                                                                                                                        |          |
| TGFB2 (human)                                            | LDS 1B and 2B Non-FBN1 related Marfan syndrome             | Marfan syndrome shows striking pleiotropism and clinical variability. The cardinal features occur in 3 systems: skeletal, ocular, and cardiovascular; a highly arched palate with crowding of the teeth are frequent skeletal features                                                                                                                 | (41–43)  |
| Tgfrb2 (mouse)                                           | Tgfr2 <sup>fl/fl</sup> ; Wnt1-cre                          | Severe skull defects, missing frontal and severely retarded parietal bone, cleft palate, reduced mandible and maxilla; skull size is 25% smaller than littermates                                                                                                                                                                                      | (39, 44) |
| Treacle (human)                                          | Treacher-Collins syndrome                                  | Antimongoloid slant of the eyes, coloboma of the lid, micrognathia, microtia and other ear deformities, hypoplastic zygomatic arches and macrostomia. Conductive hearing loss and cleft palate                                                                                                                                                         | (45)     |
| Treacle (mouse)                                          | Tcof <sup>+/-</sup> haploinsufficient embryos generated    | Reduced head size, frontonasal dysplasia, failure of palatal shelves to fuse resulting in cleft palate, poorly formed nasal passages, die within 24h of birth from respiratory arrest due to cranioskeletal malformations. Required for ribosome biogenesis necessary for crest cell proliferation.                                                    | (46)     |
| Treacle (Macaca mulatta)                                 | Resus Tcof1 homolog is 93.8% identical in terms of protein | Infant macaque discovered displaying Treacher-Collins phenotype. No mutation found in TCOF1 coding or splice sites, but 87% reduction of spleen TCOF1 mRNA                                                                                                                                                                                             | (47)     |
| Treacle (dog)                                            |                                                            | Genetic analysis showed mapping to this region of mutation leading to brachycephaly in domestic dog breeds                                                                                                                                                                                                                                             | (48)     |
| Twist (human)                                            | Saethre-Chotzen syndrome                                   | Craniosynostosis, limb deformities and dysmorphic facial features including facial asymmetry.                                                                                                                                                                                                                                                          | (49, 50) |
| Twist (mouse)                                            | Twist1 <sup>-/-</sup>                                      | Embryonic lethal at E11.5, open cranial neural tube, retarded forelimb bud development and branchial arch malformations.                                                                                                                                                                                                                               | (51)     |
|                                                          | Twist conditional mutant                                   | Heterozygotes have craniofacial defects and polydactyly                                                                                                                                                                                                                                                                                                | (52)     |

**Supplementary Fig. 1. Disorders related to defects in neural crest genes/EMT**

### References

1. Lee, W.K., Root, A.W., and Fenske, N. 1982. Bilateral branchial cleft sinuses associated with intrauterine and postnatal growth retardation, premature aging, and unusual facial appearance: a new syndrome with dominant transmission. *Am J Med Genet* **11**:345–352.
2. Hall, B.D., deLorimier, A., and Foster, L.H. 1983. Brief clinical report: a new syndrome of hemangiomas branchial clefts, lip pseudoclefts, and unusual facial appearance. *Am J Med Genet* **14**:135–138.
3. Fujimoto, A., et al. 1987. New autosomal dominant branchio-oculo-facial syndrome. *Am J Med Genet* **27**:943–951.

4. Milunsky, J.M., et al. 2008. TFAP2A mutations result in branchio-oculo-facial syndrome. *Am J Hum Genet* **82**:1171–1177.
5. Schorle, H., Meier, P., Buchert, M., Jaenisch, R., and Mitchell, P.J. 1996. Transcription factor AP-2 essential for cranial closure and craniofacial development. *Nature* **381**:235–238.
6. Zhang, J., et al. 1996. Neural tube, skeletal and body wall defects in mice lacking transcription factor AP-2. *Nature* **381**:238–241.
7. Favier, R., et al. 2003. Paris-Trousseau syndrome : clinical, hematological, molecular data of ten new cases. *Thromb Haemost* **90**:893–897.
8. Alkhateeb, A., Fain, P.R., and Spritz, R.A. 2005. Candidate functional promoter variant in the FOXD3 melanoblast developmental regulator gene in autosomal dominant vitiligo. *J Invest Dermatol* **125**:388–391.
9. Hanna, L.A., Foreman, R.K., Tarasenko, I.A., Kessler, D.S., and Labosky, P.A. 2002. Requirement for Foxd3 in maintaining pluripotent cells of the early mouse embryo. *Genes Dev* **16**:2650–2661.
10. Montero-Balaguer, M., et al. 2006. The mother superior mutation ablates foxd3 activity in neural crest progenitor cells and depletes neural crest derivatives in zebrafish. *Dev Dyn* **235**:3199–3212.
11. Wang, Q., et al. 2008. Pax Genes in Embryogenesis and Oncogenesis. *J Cell Mol Med* **12**:2281–94.
12. Ishihara, N., et al. 2004. Clinical and molecular analysis of Mowat-Wilson syndrome associated with ZFH1B mutations and deletions at 2q22-q24.1. *J Med Genet* **41**:387–393.
13. Mowat, D.R., et al. 1998. Hirschsprung disease, microcephaly, mental retardation, and characteristic facial features: delineation of a new syndrome and identification of a locus at chromosome 2q22-q23. *J Med Genet* **35**:617–623.
14. Wakamatsu, N., et al. 2001. Mutations in SIP1, encoding Smad interacting protein-1, cause a form of Hirschsprung disease. *Nat Genet* **27**:369–370.
15. Zweier, C., et al. 2002. "Mowat-Wilson" syndrome with and without Hirschsprung disease is a distinct, recognizable multiple congenital anomalies-mental retardation syndrome caused by mutations in the zinc finger homeo box 1B gene. *Am J Med Genet* **108**:177–181.
16. Van de Putte, T., Francis, A., Nelles, L., van Grunsven, L.A., and Huylebroeck, D. 2007. Neural crest-specific removal of Zfhx1b in mouse leads to a wide range of neurocristopathies reminiscent of Mowat-Wilson syndrome. *Hum Mol Genet* **16**:1423–1436.
17. Murray, S.A., Oram, K.F., and Gridley, T. 2007. Multiple functions of Snail family genes during palate development in mice. *Development* **134**:1789–1797.
18. Read, A.P., and Newton, V.E. 1997. Waardenburg syndrome. *J Med Genet* **34**:656–665.
19. Spritz, R.A., Chiang, P.W., Oiso, N., and Alkhateeb, A. 2003. Human and mouse disorders of pigmentation. *Curr Opin Genet Dev* **13**:284–289.
20. Waardenburg, P.J. 1951. A new syndrome combining developmental anomalies of the eyelids, eyebrows and nose root with pigmentary defects of the iris and head hair and with congenital deafness. *Am J Hum Genet* **3**:195–253.
21. Sanchez-Martin, M., et al. 2002. SLUG (SNAI2) deletions in patients with Waardenburg disease. *Hum Mol Genet* **11**:3231–3236.
22. Carl, T.F., Dufton, C., Hanken, J., and Klymkowsky, M.W. 1999. Inhibition of neural crest migration in *Xenopus* using antisense slug RNA. *Dev Biol* **213**:101–115.
23. LaBonne, C., and Bronner-Fraser, M. 2000. Snail-related transcriptional repressors are required in *Xenopus* for both the induction of the neural crest and its subsequent migration. *Dev Biol* **221**:195–205.
24. Nieto, M.A., Sargent, M.G., Wilkinson, D.G., and Cooke, J. 1994. Control of cell behavior during vertebrate development by Slug, a zinc finger gene. *Science* **264**:835–839.
25. Maka, M., Stolt, C.C., and Wegner, M. 2005. Identification of Sox8 as a modifier gene in a mouse model of Hirschsprung disease reveals underlying molecular defect. *Dev Biol* **277**:155–169.
26. Kwok, C., et al. 1995. Mutations in SOX9, the gene responsible for Campomelic dysplasia and autosomal sex reversal. *Am J Hum Genet* **57**:1028–1036.

27. Wagner, T., et al. 1994. Autosomal sex reversal and campomelic dysplasia are caused by mutations in and around the SRY-related gene SOX9. *Cell* **79**:1111–1120.
28. Barrionuevo, F., et al. 2008. Sox9 is required for invagination of the otic placode in mice. *Dev Biol* **317**:213–224.
29. Yan, Y.L., et al. 2002. A zebrafish sox9 gene required for cartilage morphogenesis. *Development* **129**:5065–5079.
30. Badner, J.A., Sieber, W.K., Garver, K.L., and Chakravarti, A. 1990. A genetic study of Hirschsprung disease. *Am J Hum Genet* **46**:568–580.
31. Herbarth, B., et al. 1998. Mutation of the Sry-related Sox10 gene in Dominant megacolon, a mouse model for human Hirschsprung disease. *Proc Natl Acad Sci U S A* **95**:5161–5165.
32. Pingault, V., et al. 1998. SOX10 mutations in patients with Waardenburg-Hirschsprung disease. *Nat Genet* **18**:171–173.
33. Britsch, S., et al. 2001. The transcription factor Sox10 is a key regulator of peripheral glial development. *Genes Dev* **15**:66–78.
34. Dutton, K.A., et al. 2001. Zebrafish colourless encodes sox10 and specifies non-ectomesenchymal neural crest fates. *Development* **128**:4113–4125.
35. Honore, S.M., Aybar, M.J., and Mayor, R. 2003. Sox10 is required for the early development of the prospective neural crest in *Xenopus* embryos. *Dev Biol* **260**:79–96.
36. Paratore, C., Goerich, D.E., Suter, U., Wegner, M., and Sommer, L. 2001. Survival and glial fate acquisition of neural crest cells are regulated by an interplay between the transcription factor Sox10 and extrinsic combinatorial signaling. *Development* **128**:3949–3961.
37. Southard-Smith, E.M., Kos, L., and Pavan, W.J. 1998. Sox10 mutation disrupts neural crest development in Dom Hirschsprung mouse model. *Nat Genet* **18**:60–64.
38. Yagi, H., et al. 2003. Role of TBX1 in human del22q11.2 syndrome. *Lancet* **362**:1366–1373.
39. Loeyes, B.L., et al. 2005. A syndrome of altered cardiovascular, craniofacial, neurocognitive and skeletal development caused by mutations in TGFBR1 or TGFBR2. *Nat Genet* **37**:275–281.
40. Loeyes, B.L., et al. 2006. Aneurysm syndromes caused by mutations in the TGF-beta receptor. *N Engl J Med* **355**:788–798.
41. McKusick, V.A., Traisman, H.S., and Bianchine, J.W. 1972. More speculation on Marfan syndrome. *J Pediatr* **80**:530–531.
42. Pyeritz, R.E., Murphy, E.A., and McKusick, V.A. 1979. Clinical variability in the Marfan syndrome(s). *Birth Defects Orig Artic Ser* **15**:155–178.
43. Sponseller, P.D., Hobbs, W., Riley, L.H., 3rd, and Pyeritz, R.E. 1995. The thoracolumbar spine in Marfan syndrome. *J Bone Joint Surg Am* **77**:867–876.
44. Ito, Y., et al. 2003. Conditional inactivation of Tgfb2 in cranial neural crest causes cleft palate and calvaria defects. *Development* **130**:5269–5280.
45. Dixon, M.J. 1996. Treacher Collins syndrome. *Hum Mol Genet* **5** Spec No:1391–1396.
46. Dixon, J., et al. 2006. Tcof1/Treacle is required for neural crest cell formation and proliferation deficiencies that cause craniofacial abnormalities. *Proc Natl Acad Sci U S A* **103**:13403–13408.
47. Shows, K.H., et al. 2006. Reduced TCOF1 mRNA level in a rhesus macaque with Treacher Collins-like syndrome: further evidence for haploinsufficiency of treacle as the cause of disease. *Mamm Genome* **17**:168–177.
48. Haworth, K.E., et al. 2001. Canine TCOF1; cloning, chromosome assignment and genetic analysis in dogs with different head types. *Mamm Genome* **12**:622–629.
49. el Ghouzzi, V., et al. 1997. Mutations of the TWIST gene in the Saethre-Chatzen syndrome. *Nat Genet* **15**:42–46.
50. Howard, T.D., et al. 1997. Mutations in TWIST, a basic helix-loop-helix transcription factor, in Saethre-Chatzen syndrome. *Nat Genet* **15**:36–41.
51. Chen, Z.F., and Behringer, R.R. 1995. twist is required in head mesenchyme for cranial neural tube morphogenesis. *Genes Dev* **9**:686–699.
52. Chen, Y.T., Akinwunmi, P.O., Deng, J.M., Tam, O.H., and Behringer, R.R. 2007. Generation of a Twist1 conditional null allele in the mouse. *Genesis* **45**:588–592.
